# Supplementary material
Source: publisher figshare collection journal article supplement (https://sage.figshare.com/ndownloader/files/13805840)
Supplement: Supplementary file 1 [file 13805840]

**Supplementary Table 1**

*Descriptive statistics and correlation between all five moral foundations, intolerance of ambiguity and generalized prejudice*

|  | *α* | *M* | *SD* | 1. | 2. | 3. | 4. | 5. | 6. | 7. | 8. | 9. | 10. | 11. |
| --- | --- | --- | --- | --- | --- | --- | --- | --- | --- | --- | --- | --- | --- | --- |
| **Moral foundations** | .76 |  |  |  |  |  |  |  |  |  |  |  |  |  |
| 1. Care | .65 | 4.56 | 0.85 | - |  |  |  |  |  |  |  |  |  |  |
| 1. Fairness | .70 | 4.51 | 0.84 | .55*** | - |  |  |  |  |  |  |  |  |  |
| 1. Loyalty | .58 | 3.16 | 0.80 | .11* | .03 | - |  |  |  |  |  |  |  |  |
| 1. Authority | .66 | 3.06 | 0.88 | -.08 | -.19*** | .48*** | - |  |  |  |  |  |  |  |
| 1. Sanctity | .66 | 2.20 | 0.78 | .08 | -.04 | .43*** | .52*** | - |  |  |  |  |  |  |
| **Intolerance ambiguity** | .80 |  |  |  |  |  |  |  |  |  |  |  |  |  |
| 1. Discomfort ambiguity | .85 | 3.66 | 1.22 | .04 | .14** | .04 | .03 | .12* | - |  |  |  |  |  |
| 1. Moral absolutism | .82 | 2.70 | 1.02 | -.21*** | -.17*** | .29*** | .50*** | .42*** | .20*** | - |  |  |  |  |
| 1. Need for complexity | .77 | 4.16 | .95 | .08 | .16** | -.06 | -.27*** | -.17*** | .16** | -.08 | - |  |  |  |
| **Generalized prejudice** | .81 |  |  |  |  |  |  |  |  |  |  |  |  |  |
| 1. Derogated groups | .85 | 3.83 | 0.88 | -.24*** | -.20*** | .08 | .22*** | .18*** | .15** | .22*** | -.09 | - |  |  |
| 1. Dangerous groups | .66 | 6.05 | 0.71 | .11* | -.02 | .12* | .22*** | .15** | .08 | .06 | -.10* | .09 | - |  |
| 1. Dissident groups | .70 | 2.86 | 1.31 | -.30*** | -.37*** | .18*** | .46*** | .23*** | -.07 | .31*** | -.19*** | .44*** | -.02 | - |

*Note*. α = Cronbach’s alpha reliability, *** *p* < .001, ** *p* < .01, * *p* < .05

**Supplementary Table 2**

*Intolerance of ambiguity factors: item parceling*

|  |  | |
| --- | --- | --- |
| Item | Parcel | Item-total correlation |
| **Discomfort with ambiguity** |  |  |
| I get pretty anxious when I’m in a social situation involving me which I have little control of. | x1 | .70 |
| It intensely disturbs me when I am uncertain of how my actions will affect others. | x1 | .37 |
| I am just a little uncomfortable with people unless I feel that I can understand their behavior. | x2 | .63 |
| If I don’t get the punch line of a joke, I don’t feel right until I understand it. | x2 | .37 |
| It bothers me when I don’t know how other people react to me. | x3 | .62 |
| I don’t feel comfortable with people until I can find out something about them. | x3 | .49 |
| If I am uncertain about the responsibilities of a job, I get very anxious. | x3 | .53 |
| **Moral absolutism** |  |  |
| There’s a right way and a wrong way to do almost everything. | x4 | .63 |
| Our thinking would be a lot better off if we would just forget about words like “probably,” “approximately,” “perhaps.” | x4 | .44 |
| You can classify almost all people as either honest or crooked. | x5 | .63 |
| A person either knows the answer to a question or he doesn’t. | x5 | .49 |
| There are two kinds of people: the “good” and the “bad. | x6 | .57 |
| There are two kinds of people in the world: the weak and the strong. | x6 | .54 |
| A person is either a 100% patriotic or he isn’t. | x6 | .56 |
| **Need for complexity** |  |  |
| I enjoy tackling problems which are complex enough to be ambiguous. | x7 | .61 |
| Vague and impressionistic pictures appeal to me more than realistic pictures. | x7 | .26 |
| Some problems are so complex that just trying to understand them is fun. | x8 | .59 |
| I tend to like obscure or hidden symbolism. | x8 | .39 |
| I pursue problem situations which are so complex some people call them “mind boggling.” | x9 | .52 |
| It is more fun to tackle a complicated problem than to solve a simple one. | x9 | .44 |
| I’m drawn to situations which can be interpreted in more than one way”. | x9 | .44 |

**Supplementary Table 3**

*Prejudice against derogated, dangerous, and dissident groups: item parceling*

|  |  | |
| --- | --- | --- |
| Item | Parcel | Item-total correlation | |
| **Derogated groups** |  |  | |
| People who just seem to be losers | x10 | .63 | |
| Physically unattractive people | x10 | .61 | |
| Mentally handicapped people | x10 | .56 | |
| Prostitutes | x10 | .35 | |
| Obese people | x11 | .62 | |
| Unemployed people | x11 | .61 | |
| Drug users | x11 | .51 | |
| Psychiatric patients | x12 | .62 | |
| People who in appearance or performance just do not make the grade | x12 | .58 | |
| Muslims | x12 | .48 | |
| **Dangerous groups** |  |  | |
| People who make our society dangerous for others | x13 | .55 | |
| People who behave in immoral ways | x13 | .34 | |
| People who disrupt safety and security in our society | x14 | .51 | |
| Gang members | x14 | .34 | |
| People who cause disagreement in our society | x15 | .37 | |
| Violent people | x15 | .34 | |
| **Dissident groups** |  |  | |
| Feminists | x16 | .62 | |
| LGBT activists | x17 | .65 | |
| Protestors | x18 | .33 | |

**Supplementary Table 4**

*Direct, indirect and total effects (unstandardized effects with bias-corrected 95% bootstrap confidence intervals) for Model 1 with intolerance of ambiguity as mediator of the relation between moral foundations and generalized prejudice against dissident, dangerous, and derogated groups*

| Independent variable:  Dependent variable: | Binding intuitions  Dissident groups | | Individualizing intuitions  Dissident groups | | | Binding intuitions  Dangerous groups | | | Individualizing intuitions  Dangerous groups | | | Binding intuitions  Derogated groups | | | Individualizing intuitions  Derogated groups | | |
| --- | --- | --- | --- | --- | --- | --- | --- | --- | --- | --- | --- | --- | --- | --- | --- | --- | --- |
| Direct effect | .55[.30, .88]*** | | -.44[-.69, -.26]*** | | | .53[.28, .83]*** | | | Not estimated | | | .36[.08, .69]* | | | -.42[-.61, -.25]*** | | |
| Total effect | .53[.35, .76]*** | | -.46[-.68, -.29]*** | | | .33[.13, .54]*** | | | .09[.04, .19]** | | | .36[.20, .53]*** | | | -.38[-.54, -.25]*** | | |
| Total indirect effect | -.01[-.20, .13] | | -.01[-.07, .06] | | | -.20[-.42, -.04]* | | | .09[.04, .19]** | | | .00[-.25, .21] | | | .04[-.05, .15] | | |
| Indirect effect through moral absolutism | .02[-.14, .14] | | -.01[-.05, .05] | | | -.21[-.42, -.07]** | | | .08[.03, .17]** | | | -.02[-.22, .16] | | | .01[-.06, .10] | | |
| Indirect effect through discomfort with ambiguity | -.01[-.040, .00] | | -.01[-.05, .00]# | | | .01[-.00, .05] | | | .01[-.00, .06] | | | .02[-.01, .07] | | | .03[-.00, .10] | | |
| Indirect effect through need for complexity | -.03[-.09, .01] | | .01[-.00, .04] | | | .00[-.05, .07] | | | .00[-.03, .02] | | | -.00[-.08, .06] | | | .00[-.02, .03] | | |
|  |  |  | |  |  | |  |  | |  |  | |  |  | |  |  | |

*Note.* *** *p* < .001, ** *p* < .01, * *p* < .05, # *p* < .10.

**Supplementary Table 5**

*Direct, indirect and total effects (unstandardized effects with bias-corrected 95% bootstrap confidence intervals) for Model 2 with moral foundations as mediators of the relation between intolerance of ambiguity and generalized prejudice against dissident, dangerous, and derogated groups*

| Independent variable:  Dependent variable: | Discomfort with ambiguity  Dissident groups | | Moral absolutism  Dissident groups | | | Need for complexity  Dissident groups | | | Discomfort with ambiguity  Dangerous groups | | | Moral absolutism  Dangerous groups | Need for complexity  Dangerous groups | | | Discomfort with ambiguity  Derogated groups | | | Moral absolutism  Derogated groups | | Need for complexity  Derogated groups |
| --- | --- | --- | --- | --- | --- | --- | --- | --- | --- | --- | --- | --- | --- | --- | --- | --- | --- | --- | --- | --- | --- |
| Direct effect | Not estimated | | Not estimated | | | Not estimated | | | Not estimated | | | -.17[-.37, -.02]* | Not estimated | | | .13[.06, .22]*** | | | Not estimated | | Not estimated |
| Total effect | Not estimated | | Not estimated | | | Not estimated | | | Not estimated | | | -.01[-.14, .09] | Not estimated | | | .10[.02, .18]* | | | Not estimated | | Not estimated |
| Total indirect effect | -.04[-.10, .01] | | .31[.21, .44]*** | | | -.12[-.20, -.06]*** | | | .02[-.02, .06] | | | .16[.05, .31]** | -.08[-.16, -.03]** | | | -.04[-.08, .00]# | | | .22[.15, .30]*** | | -.08[-.14, -.03]** |
| Indirect effect through binding intuitions | .11[-.02, .05] | | .20[.12, .29]*** | | | -.09[-.16, -.05]*** | | | .01[-.02, .05] | | | .18[.09, .31]*** | -.09[-.16, -.04]*** | | | .01[-.01, .03] | | | .12[.06, .19]*** | | -.06[-.10, -.03]** |
| Indirect effect through individualizing intuitions | -.05[-.10, -.01]* | | .12[.07, .20]*** | | | -.03[-.08, .02] | | | .01[-.01, .04] | | | -.02[-.07, .02] | .00[-.00, .03] | | | -.04[-.09, -.01]* | | | .10[.06, .17]*** | | -.02[-.07, .02] |
|  |  |  | |  |  | |  |  | |  |  | | |  |  | |  |  | |

*Note.* *** *p* < .001, ** *p* < .01, * *p* < .05, # *p* < .10.
